# Supplementary material
Source: PubMed Central journal article supplement (PMC8605992)
Supplement: NIHMS1737700-supplement-fig_S2.pdf [file NIHMS1737700-supplement-fig_S2.pdf]

**Pre-procedure**

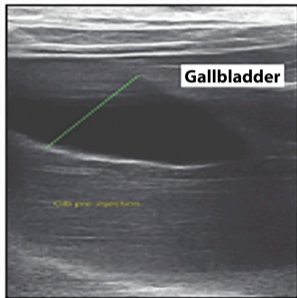

**Post-procedure**

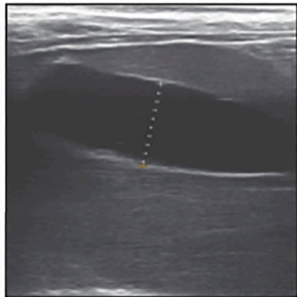

**A**

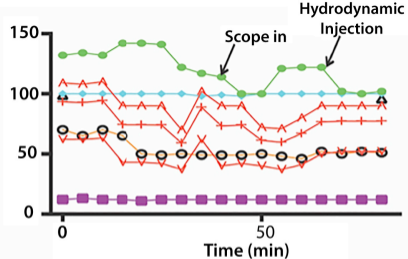

● Heart Rate (bpm)

▲ SBP (mmHg)

▼ DBP (mmHg)

◆ MAP (mmHg)

◆ SpO2 (%)

○ ETCO2

■ Respiratory Rate (bpm)

▲ Temperature (F)

**B**
