# Supplementary material
Source: PubMed Central journal article supplement (PMC8605992)

## DNA detection at three-week post-injection

Pig #1

Pig #2

Pig #4

CTL CTL

LLL LML Q RML RLL LLL LML Q RML RLL LLL LML Q RML RLL (+) (-)

500 bp

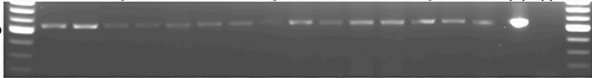

Supplement: NIHMS1737700-supplement-fig_S3.pdf [file NIHMS1737700-supplement-fig_S3.pdf]
