# Supplementary material
Source: PubMed Central journal article supplement (PMC8605992)

## pT-LP1-hFIX

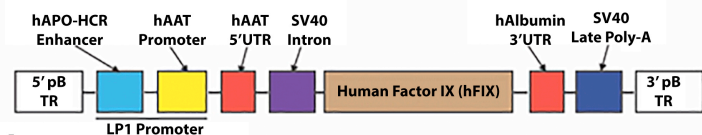

**A**

## pCMV-HyPBase

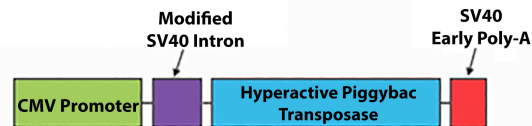

**B**

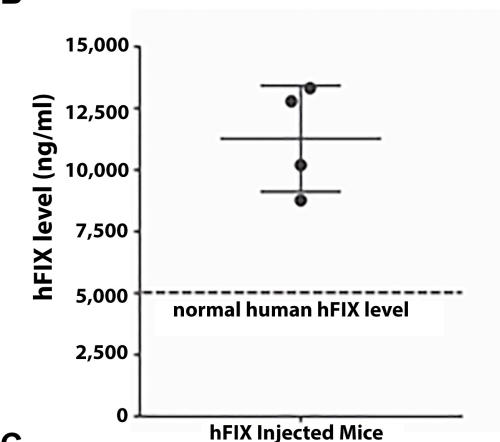

**C**

## human Factor IX-stained mouse liver

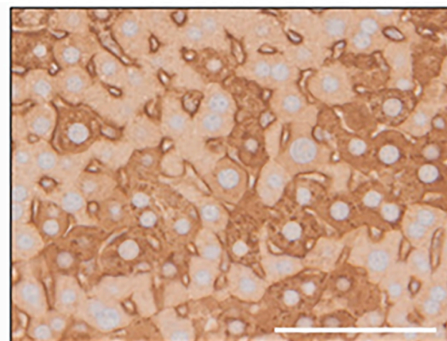

**D**

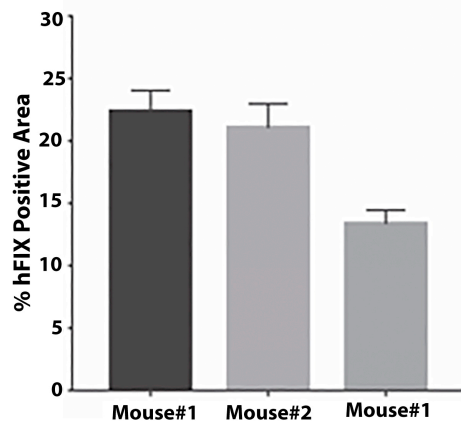

**E**

Supplement: NIHMS1737700-supplement-fig_S1.pdf [file NIHMS1737700-supplement-fig_S1.pdf]

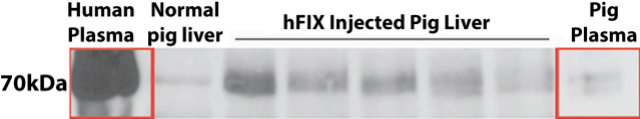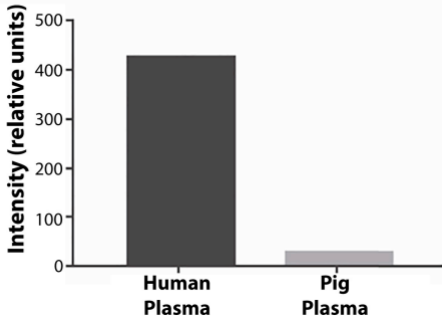

Supplement: NIHMS1737700-supplement-fig_S4.pdf [file NIHMS1737700-supplement-fig_S4.pdf]

## Liver Lobule

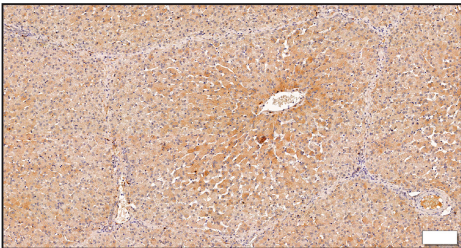

## Liver Metabolic Zones

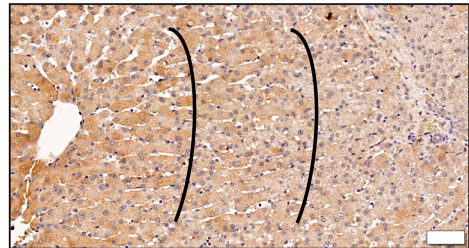

## Portal Triad

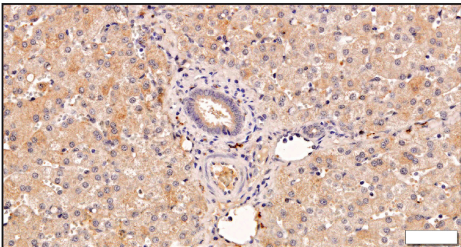

## Central Vein

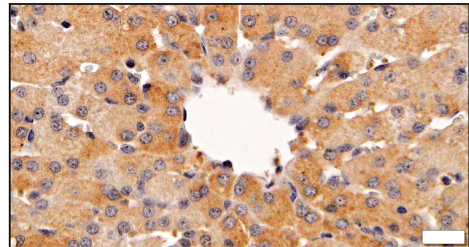

Supplement: NIHMS1737700-supplement-fig_S5.pdf [file NIHMS1737700-supplement-fig_S5.pdf]

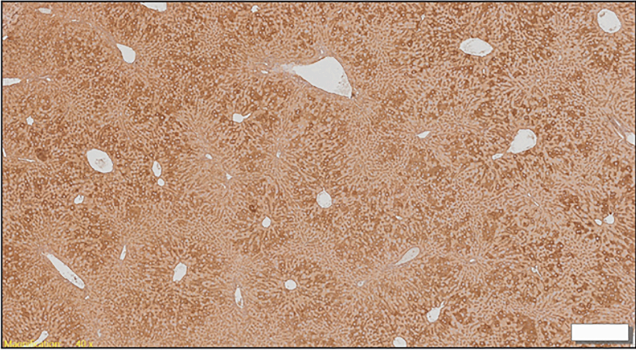

Supplement: NIHMS1737700-supplement-fig_S6.pdf [file NIHMS1737700-supplement-fig_S6.pdf]
